# Supplementary material for: Effective coverage of primary care services in eight high-mortality countries
Source: PubMed Central journal article supplement (PMC5887868; doi:10.1136/bmjgh-2017-000424), 2017-09-04
Supplement: bmjgh-2017-000424supp001.pdf [file bmjgh-2017-000424supp001.pdf]

Supplement table 1: Quality indices for direct observation of clinical care

| <b>ANTENATAL CARE</b>                                                                                                                                                                                     | First visit | Follow-up visit |
|-----------------------------------------------------------------------------------------------------------------------------------------------------------------------------------------------------------|-------------|-----------------|
| <i>Quality defined as the percent of the following 21 or 22 items performed. Items recommended once or twice during three follow-up visits are down-weighted by one third and two thirds respectively</i> |             |                 |
| <b>History Taking - Provider asked or checked:</b>                                                                                                                                                        |             |                 |
| Last menstrual period to calculate gestational age                                                                                                                                                        | X           |                 |
| Prior pregnancy experience, e.g. stillbirth, neonatal death, heavy bleeding, assisted delivery, multiples, and spontaneous or assisted abortion                                                           | X           |                 |
| Danger signs in current pregnancy, e.g. bleeding, fever, headache or blurred vision, swollen face or hands, tiredness or breathlessness, fetal movements                                                  | X           | X               |
| Previous complications on record                                                                                                                                                                          |             | X               |
| <b>Routine Examination – Provider performed, examined for or assessed:</b>                                                                                                                                |             |                 |
| Weight                                                                                                                                                                                                    | X           | X               |
| Fundal height                                                                                                                                                                                             | X           | X               |
| Edema                                                                                                                                                                                                     | X           | X               |
| Vaginal exam                                                                                                                                                                                              | X           |                 |
| Blood pressure                                                                                                                                                                                            | X           | X               |
| Fetal heart rate                                                                                                                                                                                          |             | X               |
| Ultrasound                                                                                                                                                                                                | X           |                 |
| <b>Screening – Provider asked about, performed, or referred patient for:</b>                                                                                                                              |             |                 |
| Syphilis test                                                                                                                                                                                             | X           | 1/3             |
| HIV test                                                                                                                                                                                                  | X           | 1/3*            |
| Anemia test                                                                                                                                                                                               | X           | 2/3             |
| Blood group test                                                                                                                                                                                          | X           |                 |
| Urine test (proteinuria, bacteriuria)                                                                                                                                                                     | X           | 2/3             |
| <b>Preventive measures</b>                                                                                                                                                                                |             |                 |
| Prescribed or gave iron or folic acid or both                                                                                                                                                             | X           | X               |
| Provider prescribed or gave tetanus toxoid injection                                                                                                                                                      | X           | 1/3             |
| Prescribed or gave intermittent preventive treatment in pregnancy (IPTp)                                                                                                                                  |             | X               |
| <b>Education – Provider counseled on:</b>                                                                                                                                                                 |             |                 |
| Nutrition                                                                                                                                                                                                 | X           | X               |
| Sleeping under an insecticide-treated net                                                                                                                                                                 | X           | X               |
| Delivery planning: preparation (money, transport) and location                                                                                                                                            | X           | X               |
| Emergency planning: supplies for home delivery                                                                                                                                                            | X           | X               |
| Breastfeeding                                                                                                                                                                                             |             | 2/3             |
| Post-partum and postnatal care                                                                                                                                                                            |             | 2/3             |
| Pregnancy spacing                                                                                                                                                                                         |             | 2/3             |
| <b>Record keeping</b>                                                                                                                                                                                     |             |                 |
| Provider completed ANC card                                                                                                                                                                               | X           | X               |

\*HIV retesting is recommended in countries with generalized HIV epidemics (>1% prevalence among women seeking ANC); this item was included in calculating quality for all countries except for Senegal.

**FAMILY PLANNING**

*Quality defined as the percent of the following 16 items performed:*

**Reproductive history**

Age

Living children

Last delivery date

Pregnancy complications

Last menstrual period

Desire for child / more children

Desired timing for birth of next child

Breastfeeding

Menses

**Health history / exam**

Blood pressure

Weight

Smoking

STI symptoms

Chronic illness

Pelvic exam

**Counsel on method**

Any counseling on method

**SICK-CHILD CARE**

Quality defined as the percent of the following 16 or 21 items performed:

|                                                     | Children < 2 months | Children 2 months –<br>59 months |
|-----------------------------------------------------|---------------------|----------------------------------|
| <b>History taking</b>                               |                     |                                  |
| Inability to drink anything                         | X                   | X                                |
| Normal feeding pattern                              | X                   |                                  |
| Sick feeding pattern                                | X                   |                                  |
| Cough or difficult breathing                        |                     | X                                |
| Diarrhea and blood in stool (dysentery)             | X                   | X                                |
| Fever                                               |                     | X                                |
| Vomiting                                            |                     | X                                |
| Convulsions                                         | X                   | X                                |
| Maternal HIV status                                 | X                   | X                                |
| Ear problems                                        |                     | X                                |
| <b>Routine examination</b>                          |                     |                                  |
| Weight                                              | X                   | X                                |
| Plotted weight on chart                             | X                   | X                                |
| Temperature                                         | X                   | X                                |
| Pallor                                              |                     | X                                |
| Edema of feet                                       |                     | X                                |
| Mouth (thrush in IMCI)                              | X                   |                                  |
| <b>Drug administration and immunization</b>         |                     |                                  |
| Checked immunization card or immunized              | X                   | X                                |
| Vitamin A dosage                                    | X                   | X                                |
| Deworming medication                                |                     | X                                |
| <b>Client Education and Counseling</b>              |                     |                                  |
| Explained how to administer prescribed medication   | X                   | X                                |
| Directions for feeding                              | X                   | X                                |
| Described danger signs requiring return to facility | X                   | X                                |
| Scheduled/discussed return visit                    | X                   | X                                |
| Gave diagnosis                                      |                     | X                                |

Supplement table 2: Description of common geographic regions in health system and population surveys

| Country  | N  | Type                 | Notes                                                                                                                                                                                                          | Population in 1000s<br>Median (IQR) | Area in 1000 km <sup>2</sup><br>Median (IQR) |
|----------|----|----------------------|----------------------------------------------------------------------------------------------------------------------------------------------------------------------------------------------------------------|-------------------------------------|----------------------------------------------|
| Haiti    | 11 | Departments          | Facility location from SPA data combined with administrative boundaries to separate Aire Metropolitaine as distinct region; household data from post-earthquake camps excluded from study                      | 542.3<br>(326.6, 1040.9)            | 2.1 (1.6, 3.5)                               |
| Kenya    | 8  | Provinces            | National administrative boundaries preceding the 2010 modification                                                                                                                                             | 4276.2<br>(2757.6, 6146.4)          | 50.1<br>(10.9, 141.8)                        |
| Malawi   | 27 | Districts            | Cities sampled separately in MICS were re-grouped with surrounding district to match administrative boundaries; MICS was not conducted in Likoma district                                                      | 367.2<br>(239.0, 606.3)             | 3.1 (1.8, 6.5)                               |
| Namibia  | 13 | Regions              | National administrative boundaries preceding the 2013 modification                                                                                                                                             | 126.8 (65.2, 192.1)                 | 49.1<br>(26.6, 104.7)                        |
| Rwanda   | 5  | Provinces            | Four provinces and the City of Kigali                                                                                                                                                                          | 1937.3<br>(1792.2, 2368.7)          | 5.9 (3.3, 5.9)                               |
| Senegal  | 4  | Geographic zones     | The 14 provinces of Senegal were grouped into four geographic zones for these surveys.                                                                                                                         | 2377.6<br>(1865.7, 3205.0)          | 50.8<br>(17.7, 80.5)                         |
| Tanzania | 30 | Regions              | National administrative (regional) boundaries                                                                                                                                                                  | 1442.6<br>(882.8, 2036.1)           | 28.9<br>(17.1, 46.9)                         |
| Uganda   | 5  | Study-specific areas | Study-specific boundaries for the household and health system surveys necessitated combining multiple areas in the central and eastern regions to create 1 completely overlapping region unique to this study. | 3458.9<br>(2250.7, 3941.3)          | 21.8<br>(15.8, 33.4)                         |

Supplement Table 3: Variation in coverage and quality within versus between countries (N=103 regions in 8 countries)

|                                           | Intraclass correlation | Intraclass correlation limiting to 5 <sup>th</sup> – 95 <sup>th</sup> percentile of regions |
|-------------------------------------------|------------------------|---------------------------------------------------------------------------------------------|
| <b>Coverage</b>                           |                        |                                                                                             |
| ANC – any                                 | 0.46                   | 0.44                                                                                        |
| ANC – 4 visits                            | 0.62                   | 0.62                                                                                        |
| Demand satisfied for modern contraception | 0.66                   | 0.69                                                                                        |
| Under-5 care seeking                      | 0.62                   | 0.64                                                                                        |
| Average of three primary care services    | 0.68                   | 0.68                                                                                        |
| <b>Quality</b>                            |                        |                                                                                             |
| ANC                                       | 0.57                   | 0.59                                                                                        |
| Family planning                           | 0.48                   | 0.47                                                                                        |
| Sick-child care                           | 0.74                   | 0.77                                                                                        |
| Average of three primary care services    | 0.60                   | 0.64                                                                                        |
| <b>Effective coverage</b>                 |                        |                                                                                             |
| ANC                                       | 0.63                   | 0.66                                                                                        |
| Family planning                           | 0.58                   | 0.61                                                                                        |
| Sick-child care                           | 0.79                   | 0.82                                                                                        |
| Average of three primary care services    | 0.67                   | 0.69                                                                                        |
